# Supplementary material for: DNA copy number changes in high-grade malignant peripheral nerve sheath tumors by array CGH
Source: PubMed Central journal article supplement (PMC2442610; doi:10.1186/1476-4598-7-48), 2008-06-03
Supplement: 1476-4598-7-48-S1.pdf [file 1476-4598-7-48-S1.pdf]

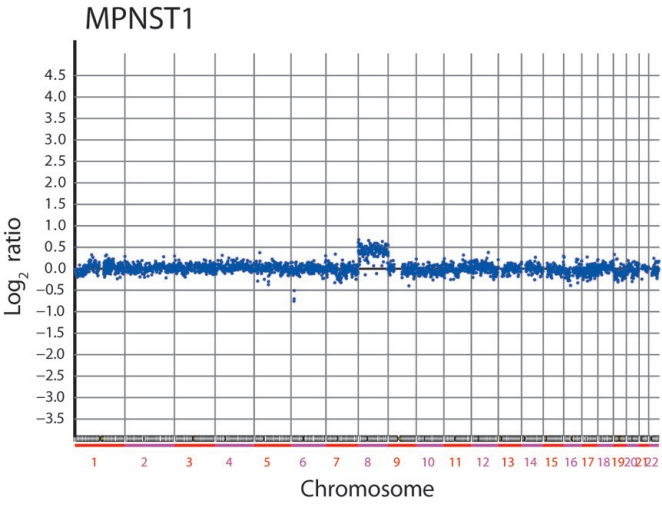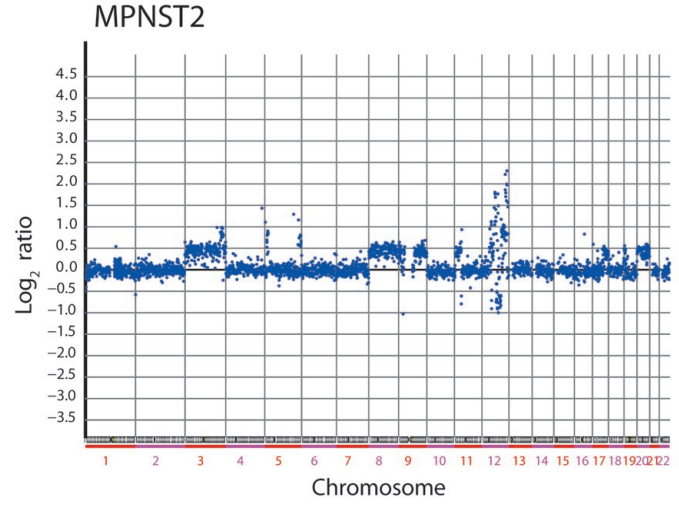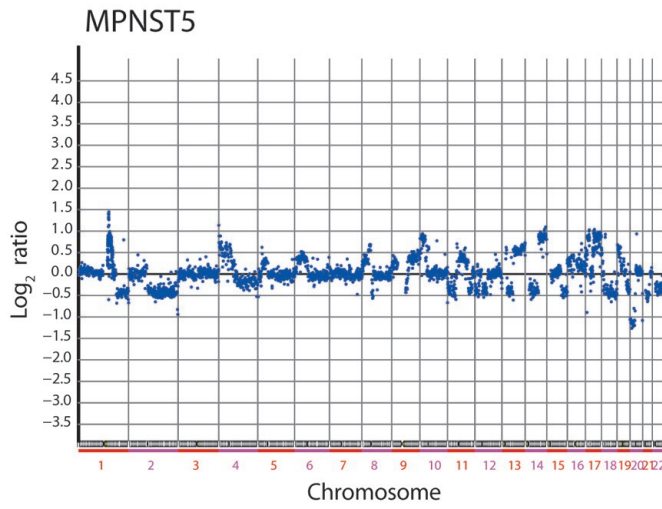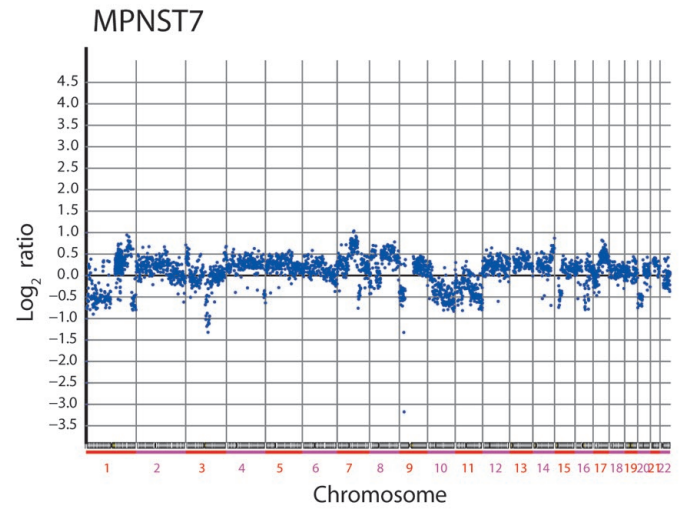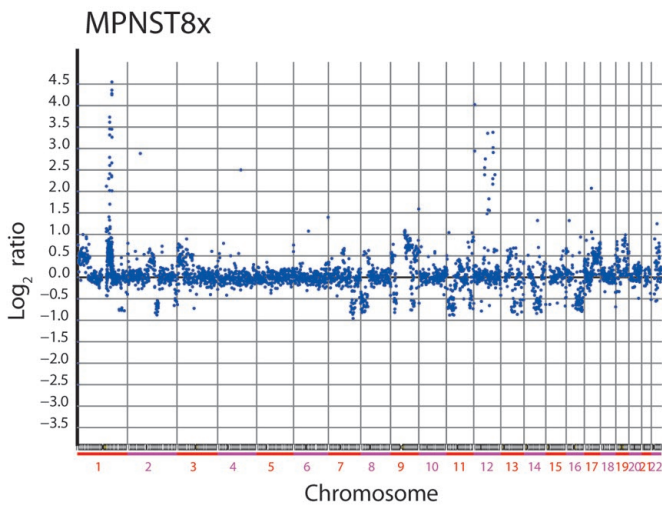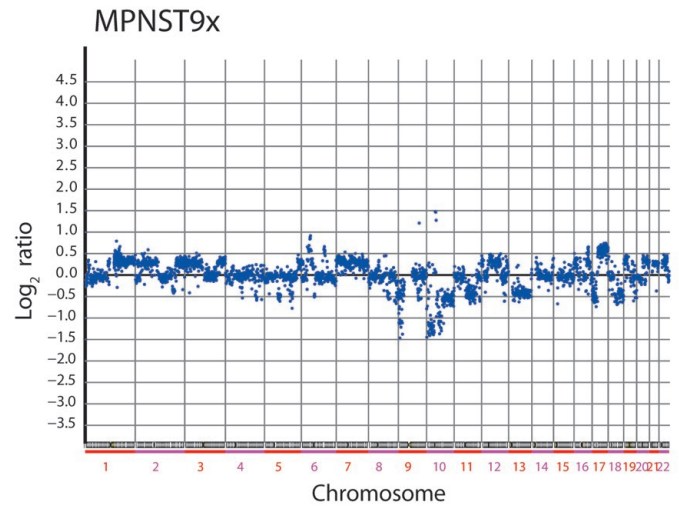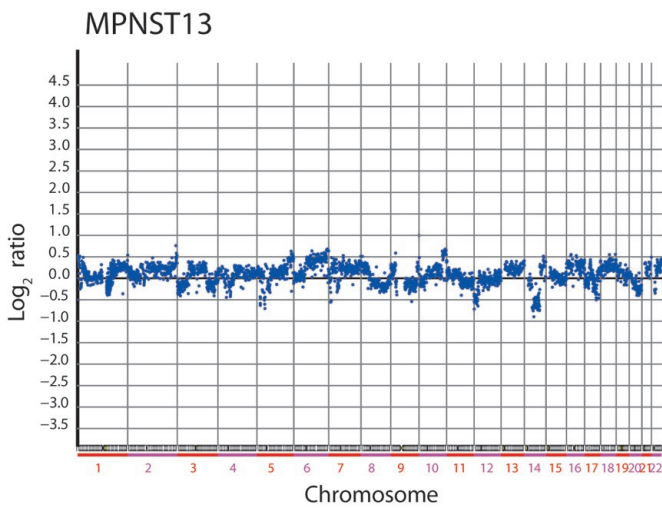

#### Supplementary Figure 1.

Whole genome DNA copy number profile for seven MPNSTs. Log<sub>2</sub> ratio for each of the genomic clones is plotted according to chromosome position.
